## CORRECTION

# Involvement of Delta/Notch signaling in zebrafish adult pigment stripe patterning

**Hiroki Hamada, Masakatsu Watanabe, Hiu Eunice Lau, Tomoki Nishida, Toshiaki Hasegawa, David M. Parichy and Shigeru Kondo**

There was an error published in *Development* **141**, 318-324.

The version of Fig. S1 originally published was incorrect (it was a duplication of Fig. S2). The correct Fig. S1 now appears in the supplementary data.

We apologise to the authors and readers for this mistake.
